# Supplementary material
Source: PubMed Central journal article supplement (PMC3702746)

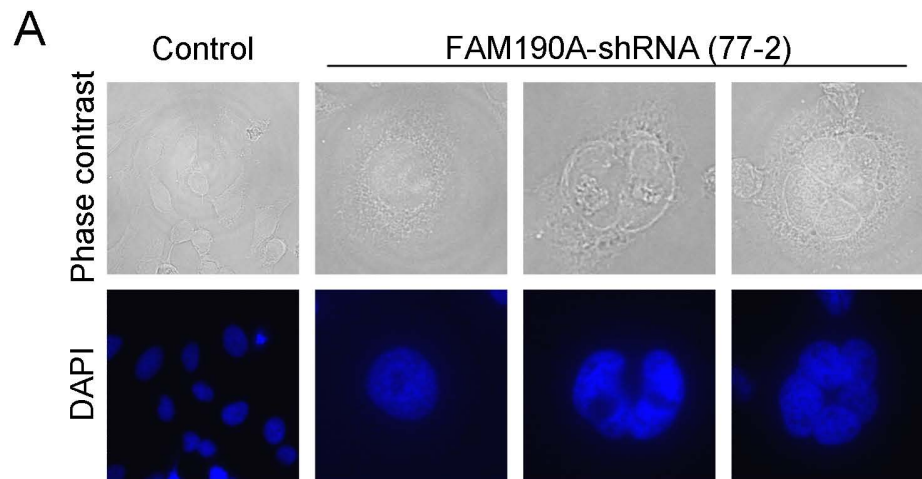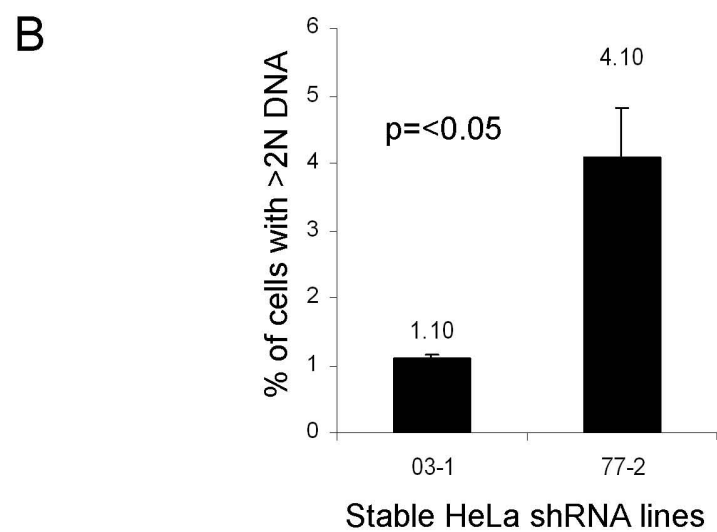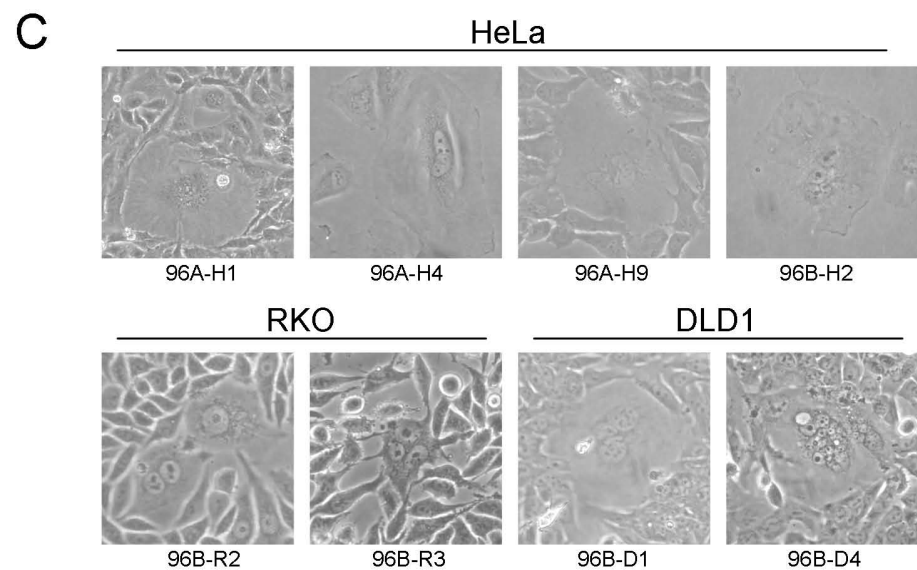

Supplement: mmc1.pdf [file mmc1.pdf]

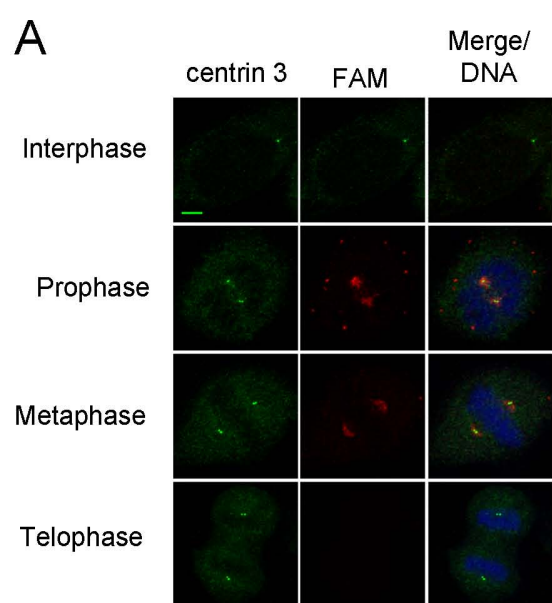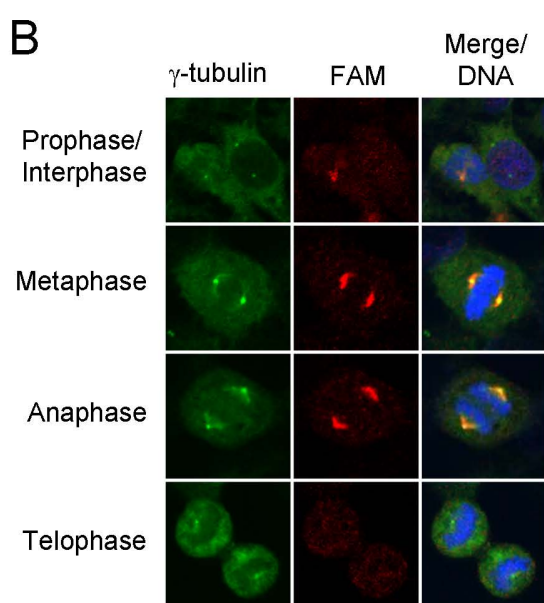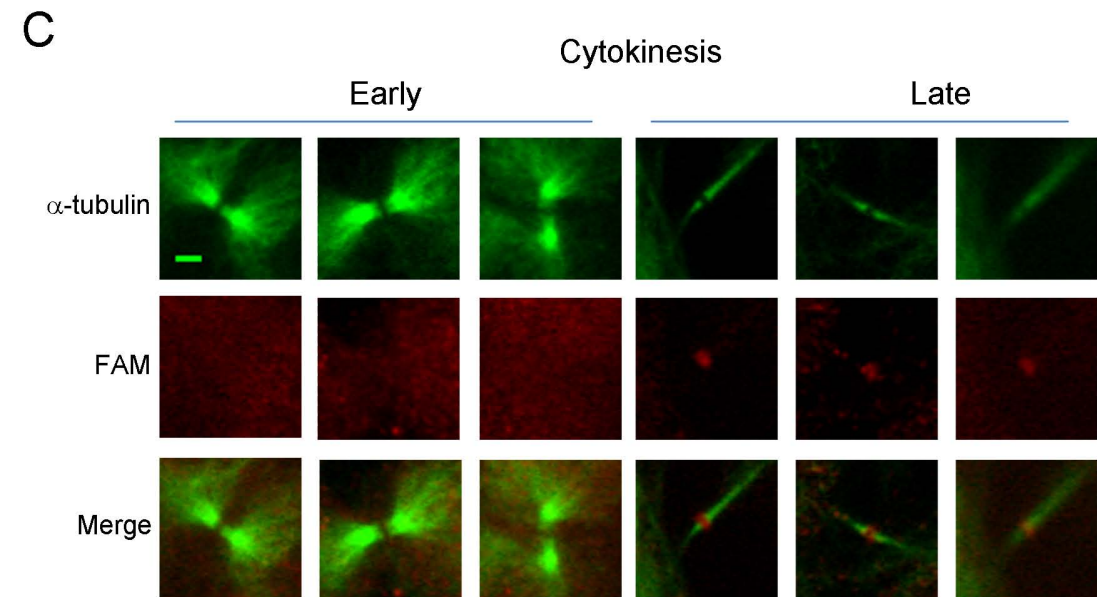

Supplement: mmc2.pdf [file mmc2.pdf]

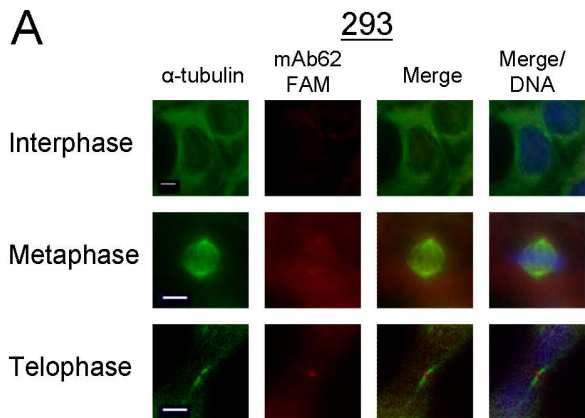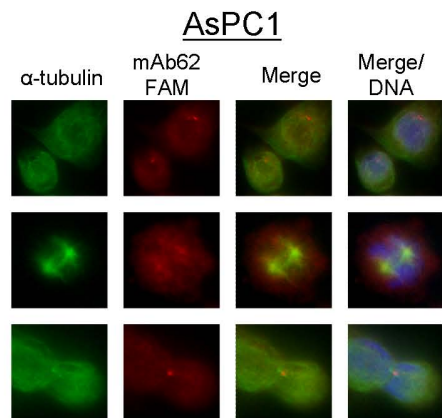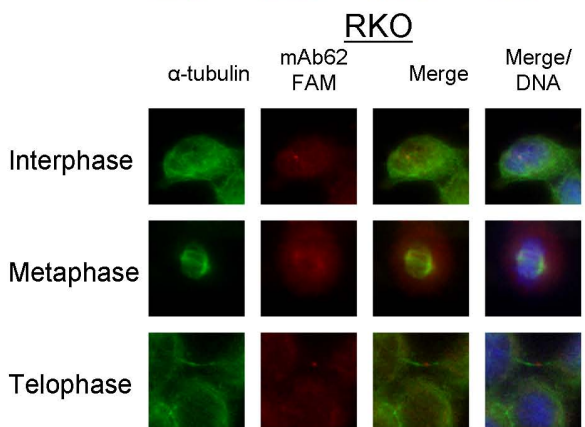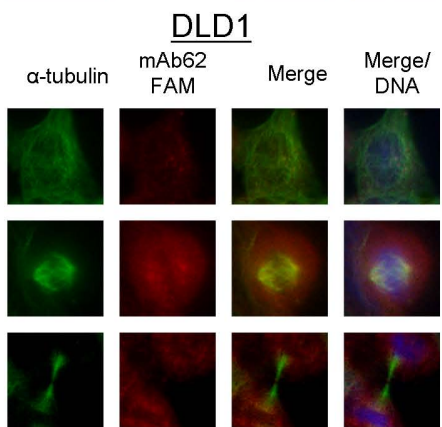

Bar:5 $\mu$ M

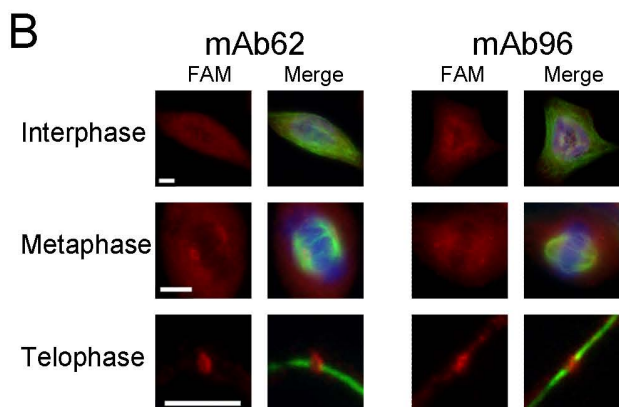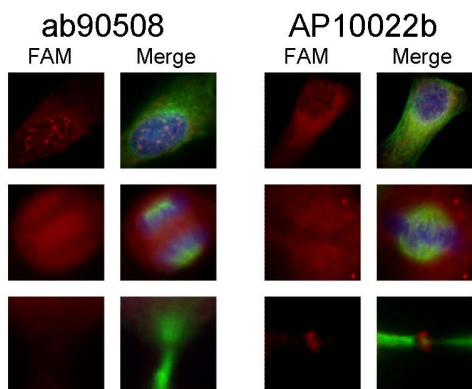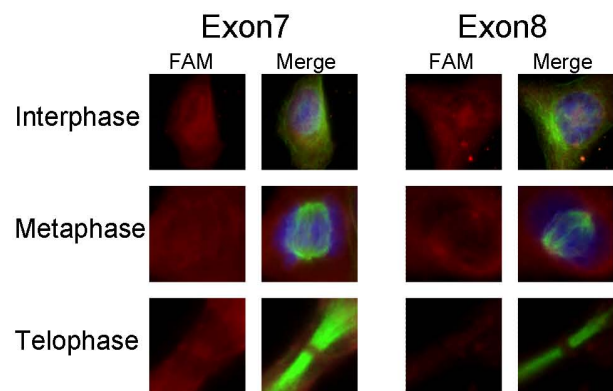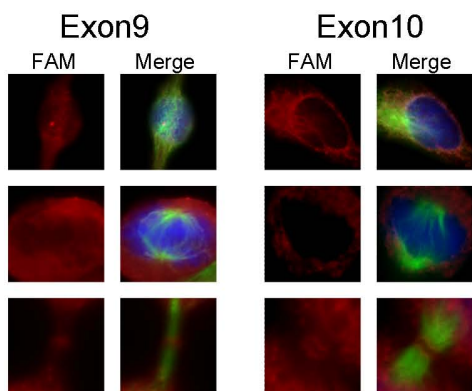

Bar:5 $\mu$ M

Supplement: mmc3.pdf [file mmc3.pdf]

**A**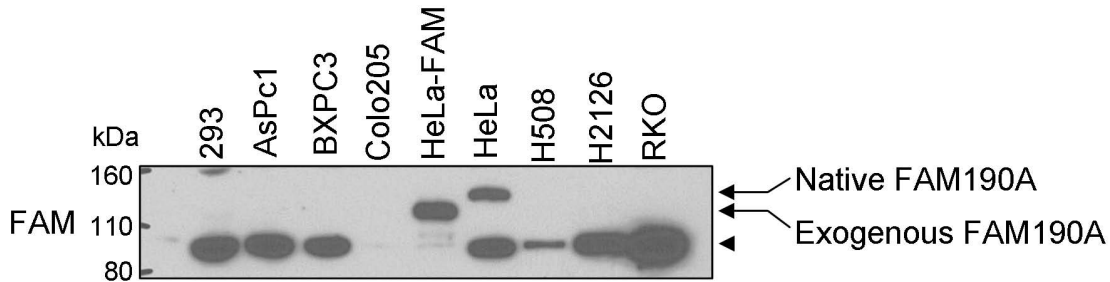**B**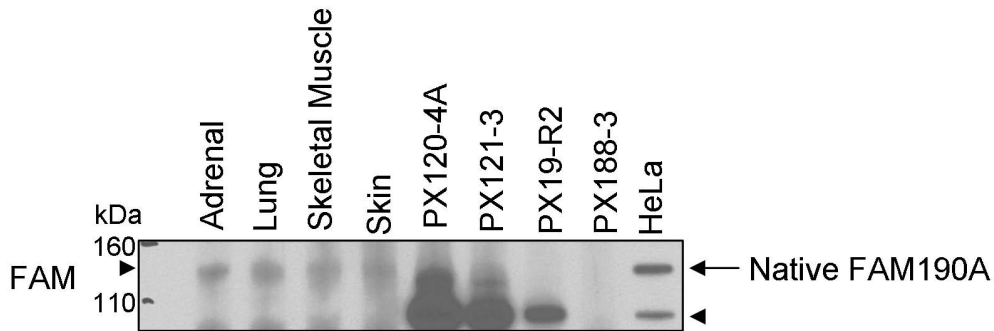

Supplement: mmc4.pdf [file mmc4.pdf]

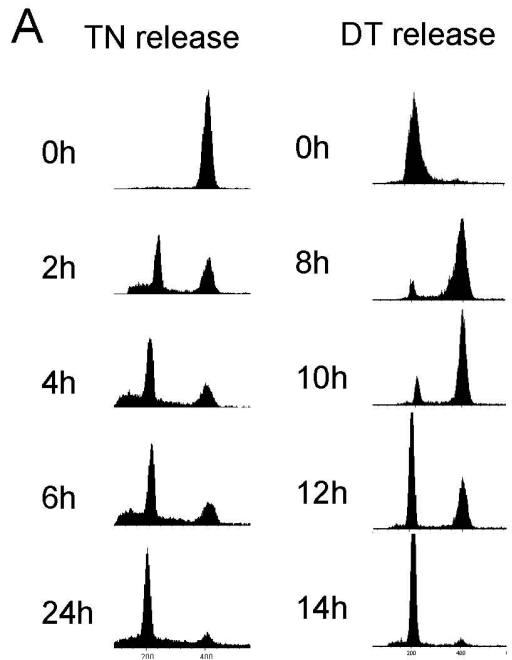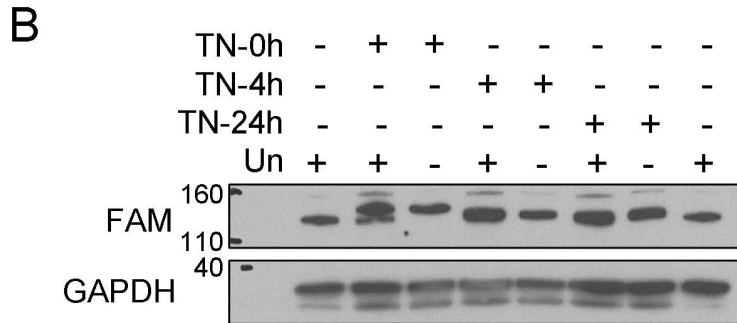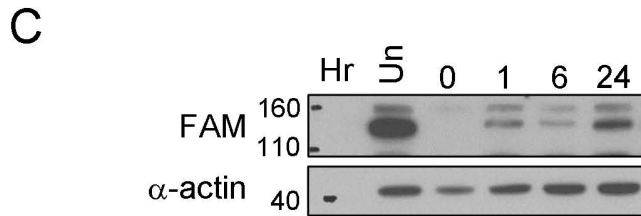

Supplement: mmc5.pdf [file mmc5.pdf]

**A**

|          |   |   |   |   |   |   |
|----------|---|---|---|---|---|---|
| DT-CIP   | + | + | - | - | - | - |
| DT       | + | - | + | - | - | - |
| DT2h     | - | - | - | + | - | + |
| DT2h-CIP | - | - | - | - | + | + |

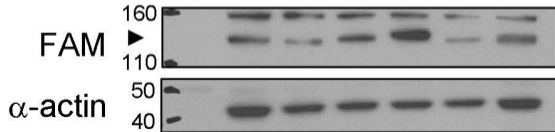**B**

|          |   |   |   |   |   |   |
|----------|---|---|---|---|---|---|
| SS-CIP   | + | + | - | - | - | - |
| SS       | + | - | + | - | - | - |
| SS2h     | - | - | - | + | - | + |
| SS2h-CIP | - | - | - | - | + | + |

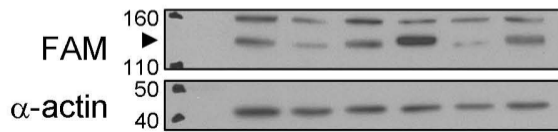

Supplement: mmc6.pdf [file mmc6.pdf]
